# Supplementary material for: Do the malnutrition universal screening tool (MUST) and Birmingham nutrition risk (BNR) score predict mortality in older hospitalised patients?
Source: PubMed Central journal article supplement (PMC2572058; doi:10.1186/1471-2318-8-26), 2008-10-10
Supplement: 1471-2318-8-26-S1.pdf [file 1471-2318-8-26-S1.pdf]

Tayside Committee on Medical Research Ethics A  
Level 9  
Ninewells Hospital & Medical School  
DUNDEE  
DD1 9SY  
Telephone Number: 01382 632701  
Fax Number: 01382 496207  
[www.nhstayside.scot.nhs.uk](http://www.nhstayside.scot.nhs.uk)

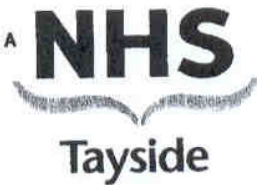

Dr Miles D Witham  
Clinical Lecturer  
Section of Ageing & Health  
Department of Medicine & Therapeutics  
Ninewells Hospital & Medical School  
DUNDEE  
DD1 9SY

Date 27 February 2006  
Your Ref  
Our Ref NFB/FB/  
Enquiries to Mr Nigel F Brown  
Extension 32701  
Direct Line 01382 632701  
Email [nigel.brown@tuht.scot.nhs.uk](mailto:nigel.brown@tuht.scot.nhs.uk)  
or  
[fiona.bain@tuht.scot.nhs.uk](mailto:fiona.bain@tuht.scot.nhs.uk)

Dear Dr Witham

**Re: Do the MUST and Birmingham Nutrition Risk Scores predict mortality in older hospitalised patients?**

Thank you for your letter of 15 February 2006 with which you enclosed a copy of the protocol in connection with the above.

I have discussed this with the Medical Advisor and we are of the opinion that this does not raise any ethical issues and therefore does not require to be submitted to the Research Ethics Committee. However, we would advise you that you should obtain Caldicott Guardian approval for access to the patients' case notes.

Yours sincerely

A handwritten signature in black ink, appearing to read 'Fiona Bain'.

**Miss Fiona Bain**  
**Assistant REC Administrator**

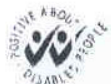

Headquarters  
Kings Cross, Clepington Road, Dundee DD3 8EA

Chairperson, Mr Peter Bates  
Chief Executive, Professor Tony Wells
